# Supplementary material for: Canola Root–Associated Microbiomes in the Canadian Prairies
Source: Front Microbiol. 2018 Jun 8;9:1188. doi: 10.3389/fmicb.2018.01188 (PMC6002653; doi:10.3389/fmicb.2018.01188)
Supplement: Table S2 — The raw sequencing counts of each sample for bacteria, fungi and archaea by MiSeq Sequencing. [file Table_2.XLSX]

## Sheet: Root_count
TABLE S2 | Raw sequencing counts of bacteria, fungi and archaea by MiSeq Sequencing
Root counts		Counts			Rhizosphere counts		Counts
Samples #	Bacteria	Fungi	Archaea	Biotope	Sample #	Bacteria	Fungi	Archaea	Biotope
Bdn101.Rt.B	8730	394	13468	Root	Bdn101.Rz.B	21043	4948	54702	Rhizosphere
Bdn102.Rt.B	24399	1706	19880	Root	Bdn102.Rz.B	18899	11237	27696	Rhizosphere
Bdn109.Rt.B	72331	282	2973	Root	Bdn109.Rz.B	15140	3025	17373	Rhizosphere
Bdn112.Rt.B	7469	458	4604	Root	Bdn112.Rz.B	28227	11280	90582	Rhizosphere
Bdn114.Rt.B	16956	477	31013	Root	Bdn114.Rz.B	12004	5633	31992	Rhizosphere
Bdn203.Rt.B	7695	691	27566	Root	Bdn203.Rz.B	17154	20290	45684	Rhizosphere
Bdn204.Rt.B	56869	334	4270	Root	Bdn204.Rz.B	15075	17934	29763	Rhizosphere
Bdn206.Rt.B	20749	1272	17859	Root	Bdn206.Rz.B	8252	5095	24091	Rhizosphere
Bdn207.Rt.B	21222	2169	16531	Root	Bdn207.Rz.B	12259	24109	34809	Rhizosphere
Bdn212.Rt.B	40580	1478	14594	Root	Bdn212.Rz.B	18966	9115	43526	Rhizosphere
Bdn305.Rt.B	33395	998	19032	Root	Bdn305.Rz.B	15171	6845	23246	Rhizosphere
Bdn309.Rt.B	6104	123	9014	Root	Bdn309.Rz.B	20126	7922	16631	Rhizosphere
Bdn311.Rt.B	7833	318	32930	Root	Bdn311.Rz.B	9225	3548	20719	Rhizosphere
Bdn312.Rt.B	27958	513	20473	Root	Bdn312.Rz.B	3574	8243	15367	Rhizosphere
Bdn313.Rt.B	47504	399	5519	Root	Bdn313.Rz.B	17254	8752	19935	Rhizosphere
Bdn401.Rt.B	42149	953	14102	Root	Bdn401.Rz.B	10469	5839	37505	Rhizosphere
Bdn404.Rt.B	13215	747	20848	Root	Bdn404.Rz.B	13590	9969	18142	Rhizosphere
Bdn405.Rt.B	34624	242	2215	Root	Bdn405.Rz.B	21008	14153	31193	Rhizosphere
Bdn406.Rt.B	14020	9207	18731	Root	Bdn406.Rz.B	24449	29187	34688	Rhizosphere
Bdn410.Rt.B	8012	1051	18792	Root	Bdn410.Rz.B	15955	8230	50541	Rhizosphere
BL101.Rt.B	18334	4360	9782	Root	BL101.Rz.B	35500	12729	5424	Rhizosphere
BL102.Rt.B	7933	629	5439	Root	BL102.Rz.B	38133	22102	12512	Rhizosphere
BL103.Rt.B	15698	2935	6017	Root	BL103.Rz.B	40164	8800	203921	Rhizosphere
BL111.Rt.B	48449	1747	20405	Root	BL111.Rz.B	16164	8935	36682	Rhizosphere
BL112.Rt.B	38985	498	10561	Root	BL112.Rz.B	33785	4409	2539	Rhizosphere
BL204.Rt.B	26344	3946	23767	Root	BL204.Rz.B	35394	32292	22188	Rhizosphere
BL205.Rt.B	11737	1758	8633	Root	BL205.Rz.B	43468	31743	66317	Rhizosphere
BL206.Rt.B	10407	3394	5683	Root	BL206.Rz.B	47092	47210	43881	Rhizosphere
BL208.Rt.B	13743	4660	9772	Root	BL208.Rz.B	41324	59199	39570	Rhizosphere
BL214.Rt.B	26678	463	2279	Root	BL214.Rz.B	36204	25947	39989	Rhizosphere
BL301.Rt.B	6761	97	2942	Root	BL301.Rz.B	44337	27049	33206	Rhizosphere
BL302.Rt.B	17273	3432	4258	Root	BL302.Rz.B	23914	14212	18801	Rhizosphere
BL306.Rt.B	25405	983	2426	Root	BL306.Rz.B	49736	33876	31508	Rhizosphere
BL307.Rt.B	36378	5807	7325	Root	BL307.Rz.B	42271	33927	30265	Rhizosphere
BL314.Rt.B	18111	1113	3501	Root	BL314.Rz.B	55465	40248	42889	Rhizosphere
BL403.Rt.B	23316	2835	2889	Root	BL403.Rz.B	44329	17881	49859	Rhizosphere
BL407.Rt.B	25163	3006	15611	Root	BL407.Rz.B	30053	48310	20127	Rhizosphere
BL410.Rt.B	61352	761	705	Root	BL410.Rz.B	22287	14438	36326	Rhizosphere
BL411.Rt.B	12214	189	7291	Root	BL411.Rz.B	29662	18028	10019	Rhizosphere
BL414.Rt.B	25066	3177	12329	Root	BL414.Rz.B	16156	32553	36711	Rhizosphere
LA101.Rt.B	22748	429	13966	Root	LA101.Rz.B	39732	24346	43665	Rhizosphere
LA102.Rt.B	16285	1960	18352	Root	LA102.Rz.B	21387	16127	53859	Rhizosphere
LA108.Rt.B	55565	257	1335	Root	LA108.Rz.B	24419	3008	14120	Rhizosphere
LA112.Rt.B	8529	1355	23126	Root	LA112.Rz.B	33135	20508	34768	Rhizosphere
LA114.Rt.B	14757	5632	32698	Root	LA114.Rz.B	33774	4850	12249	Rhizosphere
LA203.Rt.B	63149	1076	727	Root	LA203.Rz.B	46042	3035	23820	Rhizosphere
LA204.Rt.B	10349	1777	11350	Root	LA204.Rz.B	22319	10225	10051	Rhizosphere
LA206.Rt.B	14680	2153	23685	Root	LA206.Rz.B	13514	11399	43826	Rhizosphere
LA211.Rt.B	29203	3328	28478	Root	LA211.Rz.B	48819	7587	46407	Rhizosphere
LA212.Rt.B	40472	1052	16978	Root	LA212.Rz.B	29338	3572	21847	Rhizosphere
LA302.Rt.B	46092	152	329	Root	LA302.Rz.B	20870	2528	52983	Rhizosphere
LA303.Rt.B	14123	860	14410	Root	LA303.Rz.B	14810	24145	27727	Rhizosphere
LA306.Rt.B	33801	1017	10824	Root	LA306.Rz.B	30187	10759	62861	Rhizosphere
LA310.Rt.B	11252	1245	3462	Root	LA310.Rz.B	44282	45182	66870	Rhizosphere
LA313.Rt.B	15946	2173	24589	Root	LA313.Rz.B	43463	15622	35587	Rhizosphere
LA404.Rt.B	66816	290	447	Root	LA404.Rz.B	25793	3823	56067	Rhizosphere
LA405.Rt.B	46565	2540	15064	Root	LA405.Rz.B	29378	20412	22189	Rhizosphere
LA407.Rt.B	23728	3437	16004	Root	LA407.Rz.B	39768	13924	32851	Rhizosphere
LA409.Rt.B	34419	253	8635	Root	LA409.Rz.B	30998	5035	48840	Rhizosphere
LA410.Rt.B	12162	1375	2925	Root	LA410.Rz.B	33848	14845	31395	Rhizosphere
